# Supplementary material for: On the Rate of Interaction of Sodium Borohydride with Platinum (IV) Chloride Complexes in Alkaline Media
Source: MDPI journal article supplement (doi:10.3390/ma14113137), 2021-06-07
Supplement: s1 [file s1]

# On the Rate of Interaction of Sodium Borohydride with Platinum (IV) Chloride Complexes in Alkaline Media

Magdalena Luty-Błocho <sup>1,\*</sup>, Marek Wojnicki <sup>1</sup>, Edit Csapo <sup>2,3</sup> and Krzysztof Fitzner <sup>1</sup>

<sup>1</sup> Faculty of Non-Ferrous Metals, AGH University of Science and Technology, Al. A. Mickiewicza 30, 30-059 Krakow, Poland; marekw@agh.edu.pl (M.W.); fitzner@agh.edu.pl (K.F.)

<sup>2</sup> Department of Physical Chemistry and Materials Science, University of Szeged, Rerrich B. Sqr. 1, 6720 Szeged, Hungary; juhaszne.csapo.edit@med.u-szeged.hu

<sup>3</sup> MTA-SZTE Biomimetic Systems Research Group, Department of Medical Chemistry, Faculty of Medicine, University of Szeged, Dóm Sqr. 8, 6720 Szeged, Hungary

\* Correspondence: mlb@agh.edu.pl; Tel.: +48-12-617-4126

## A. Stability Diagram of $[\text{PtCl}_6]^{2-}$

In accordance with literature, in acidic aqueous solution  $[\text{PtCl}_6]^{2-}$  may form mono-aqua and di-aqua complexes in accordance with following equations:

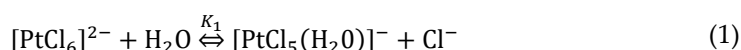

$$\text{and } K_1 = \frac{[\text{PtCl}_5(\text{H}_2\text{O})]^- [\text{Cl}^-]}{[\text{PtCl}_6]^{2-} [\text{H}_2\text{O}]}$$

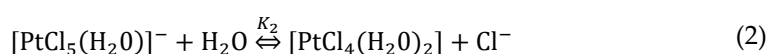

$$\text{and } K_2 = \frac{[\text{PtCl}_4(\text{H}_2\text{O})_2] [\text{Cl}^-]}{[\text{PtCl}_5(\text{H}_2\text{O})]^- [\text{H}_2\text{O}]}$$

and in mild acidic conditions the following species can be present:  $[\text{PtCl}_{6-n}(\text{H}_2\text{O})_n]^{n-2}$  (where  $n = 0-5$ ) (see, Figure S1).

At higher pH aqua complexes may transform into hydrolyzed form:

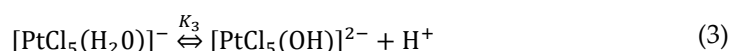

$$\text{and } K_3 = \frac{[\text{PtCl}_5(\text{OH})]^{2-} [\text{H}^+]}{[\text{PtCl}_5(\text{H}_2\text{O})]^-}$$

At pH above 8,

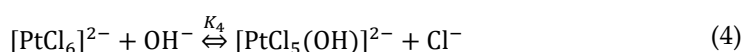

$$\text{and } K_4 = \frac{[\text{PtCl}_5(\text{OH})]^{2-} [\text{Cl}^-]}{[\text{PtCl}_6]^{2-} [\text{OH}^-]}$$

where  $K_1, K_2, K_3, K_4$  the equilibrium constant of reactions (1–4), respectively. For these reactions, values of equilibrium constant equal  $\log K_1 = 1.5-2.2$ ,  $\log K_2 = 3.7$  and  $\log K_3 = 3.5$ . Having initial concentration of  $[\text{PtCl}_6]^{2-}$ , the system of Equations (1)–(4) is solved in Excel, and the resulting equilibrium concentrations are projected on stability diagram (Figure S1).

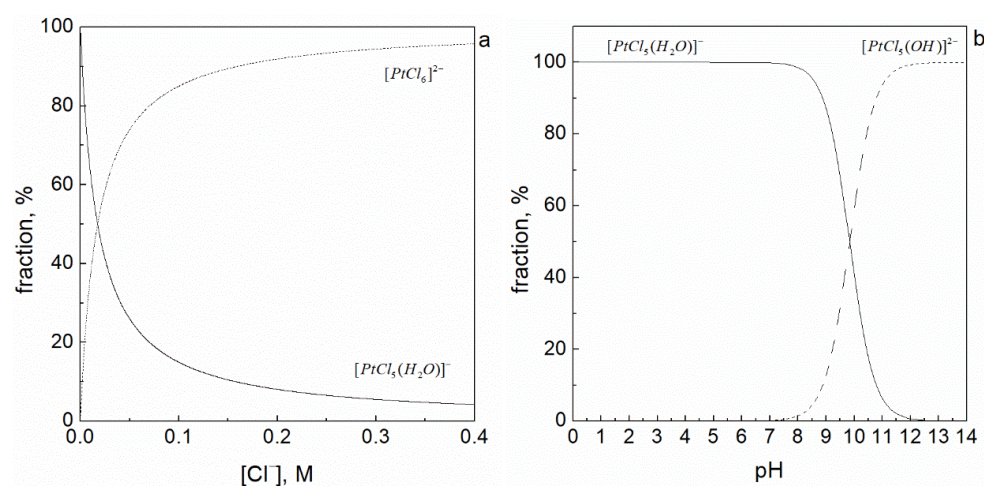

**Figure S1.** Stability diagram for Pt(IV) complex ions depending on the initial concentration of chloride ions (a) and pH of the solution (b). Conditions:  $C_{0,Pt(IV)} = 0.05$  mM,  $[Cl^-] = 0.3$  mM,  $T = 25.0 \pm 0.1$  °C.

### B. Spectra of Pt(IV) Complex Ions at Different Media

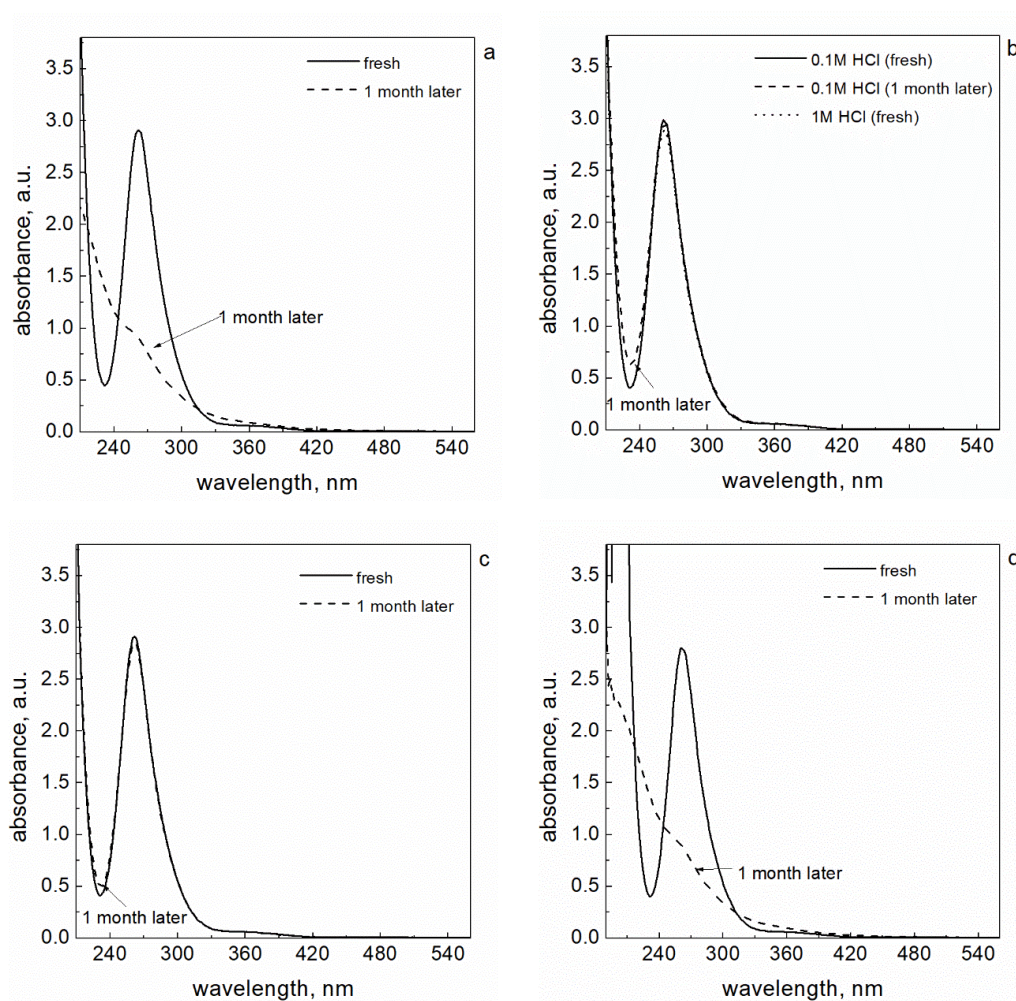

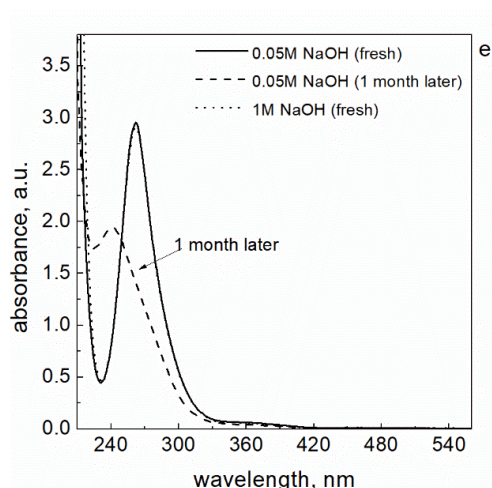

**Figure S2.** Spectra of Pt(IV) ions at different media: H<sub>2</sub>O (a), 0.1M HCl (b), 0.1 M NaCl (c), 0.1 M NaClO<sub>4</sub> (d), NaOH (e). Conditions:  $C_{0,Pt(IV)} = 0.5 \text{ mM}$ ,  $T = 25.0 \pm 0.1 \text{ }^{\circ}\text{C}$ , path length 2 mm.

### C. Spectra of Pt(IV) Complex and Molar Coefficient Determination

Route I: 0.1 mM solution of Pt(IV) ions was prepared by dissolution of proper volume of base solution in 10 mL of deionized H<sub>2</sub>O. Next, 1 mL of this solution was mixed in quartz cuvette with 1mL of aqueous solution of 0.1 M NaOH and analyzed. Subsequent dissolution was made by dilution of 1mL of already analyzed mixture with 1 mL of 0.05 M NaOH, etc. Obtained spectra for Pt(IV) ions with concentration in the range form  $0.16 \cdot 10^{-5}$  to  $5 \cdot 10^{-5} \text{ M}$  was shown in Figure S3a. According to Lambert-Beer Law, the value of molar coefficient was established from the slope of fitted curve to experimental data point at  $\lambda_{\text{max}} = 262 \text{ nm}$  and it equals  $\varepsilon_{262\text{nm}} = (29\,307 \pm 499) \text{ M}^{-1}\text{cm}^{-1}$  (Figure S3b).

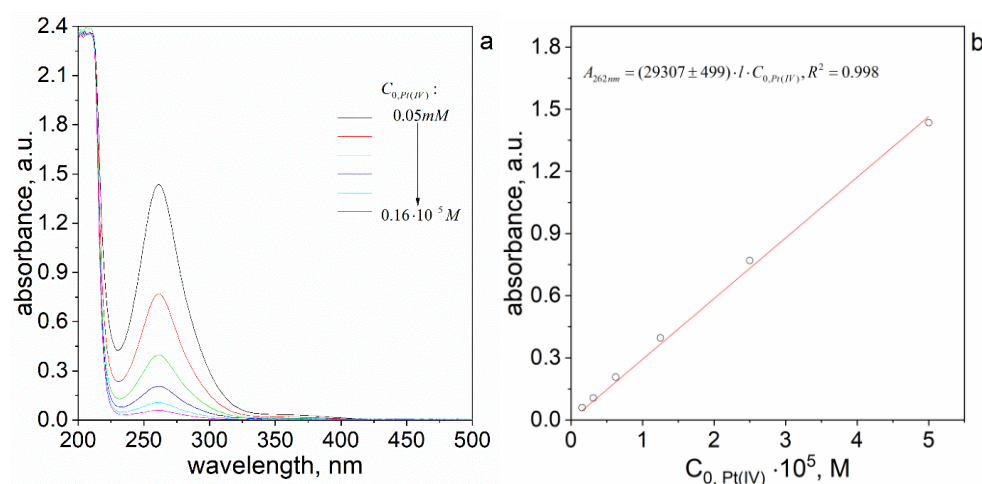

**Figure S3.** Spectra of Pt(IV) ions in 0.05 M NaOH (a); Dependency of maximum value of absorbance registered at 262 nm vs. initial concentration of Pt(IV) ions (b). Conditions:  $C_{0,Pt(IV)} = 0.16 \cdot 10^{-5} \text{ M}$ – $0.05 \text{ mM}$ ,  $T = 25.0 \pm 0.1 \text{ }^{\circ}\text{C}$ , path length 1 cm.

Route II: 0.05 mM solution of Pt(IV) ions was prepared by dissolution of proper volume of base solution directly in 10 mL of deionized 0.05 M NaOH. Next, quartz cuvette containing 2 mL of the solution was analyzed spectrophotometrically. Subsequent dissolution was made by dilution of 1 mL of already analyzed mixture with 1 mL of 0.05 M NaOH, etc. Obtained spectra for Pt(IV) ions with concentration in the range form  $0.16 \cdot 10^{-5}$  to  $5 \cdot 10^{-5} \text{ M}$  was shown in Figure S4a. According to Lambert-Beer Law, the value of molar

coefficient was established from the slope of fitted curve to experimental data point at  $\lambda_{\max} = 262 \text{ nm}$  and it equals  $\varepsilon_{262\text{nm}} = (34\,709 \pm 742) \text{ M}^{-1}\text{cm}^{-1}$  (Figure S4b).

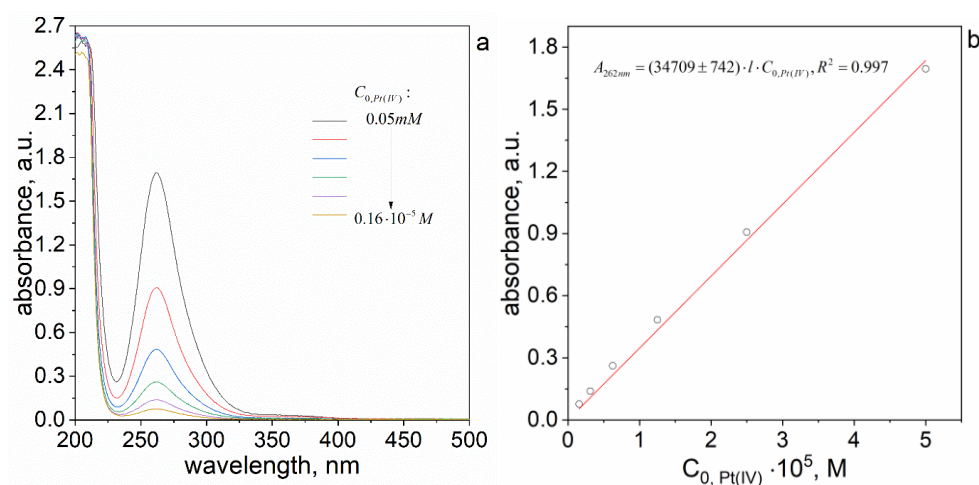

**Figure S4.** Spectra of Pt(IV) ions in 0.05 M NaOH (a); Dependency of maximum value of absorbance registered at 262 nm vs. initial concentration of Pt(IV) ions (b). Conditions:  $C_{0,\text{Pt(IV)}} = 0.16 \cdot 10^{-5} \text{ M}$ – $0.05 \text{ mM}$ ,  $T = 25.0 \pm 0.1 \text{ }^\circ\text{C}$ , path length 1 cm.

In order to check spectra stability, the solution containing 0.05 mM of Pt(IV) ions obtained in both routes were again analyzed. Obtained results were shown and compared in Figure S5.

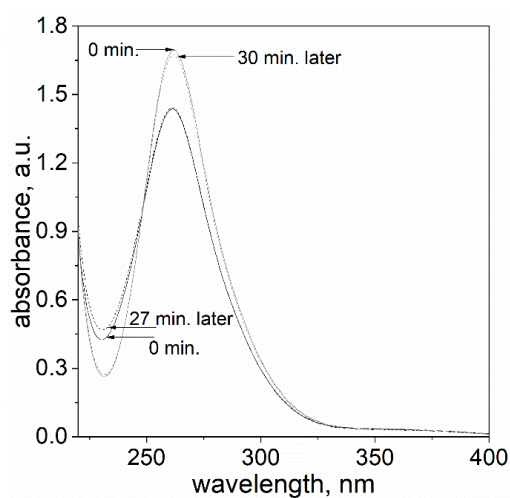

**Figure S5.** Spectra of Pt(IV) ions in 0.05M NaOH. Black line—Route I, grey line—Route II. Conditions:  $C_{0,\text{Pt(IV)}} = 0.05 \text{ mM}$ ,  $T = 25.0 \pm 0.1 \text{ }^\circ\text{C}$ , path length 1 cm.



#### D. DLS Study

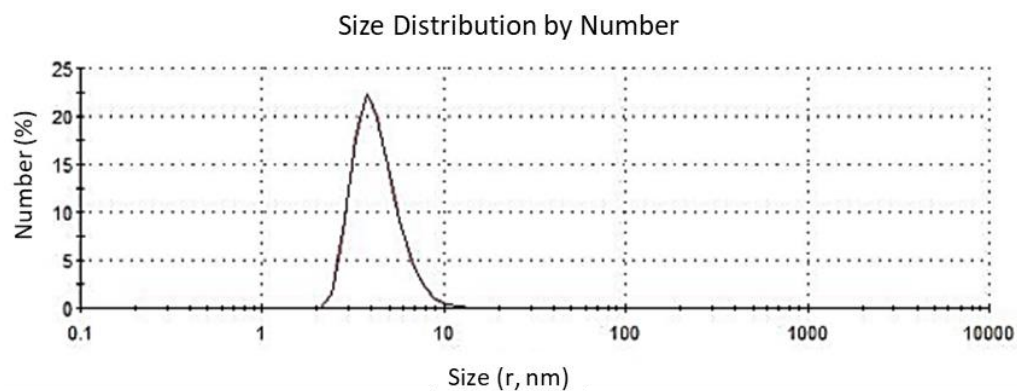

**Figure S6.** Size distribution of PtNPs by number (2 min after mixing of reagents). Conditions:  $C_{0,Pt(IV)} = 0.05$  mM,  $C_{0,NaBH_4} = 3.0$  mM,  $T = 25.0 \pm 0.1$  °C, path length 1 cm.

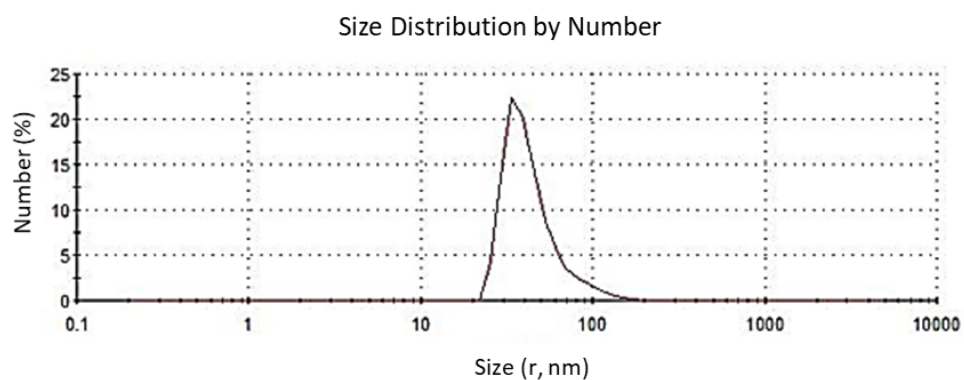

**Figure S7.** Size distribution of PtNPs by number (10 min after mixing of reagents). Conditions:  $C_{0,Pt(IV)} = 0.05$  mM,  $C_{0,NaBH_4} = 3.0$  mM,  $T = 25.0 \pm 0.1$  °C, path length 1 cm.

#### E. Kinetic Curve Registered for PtNPs

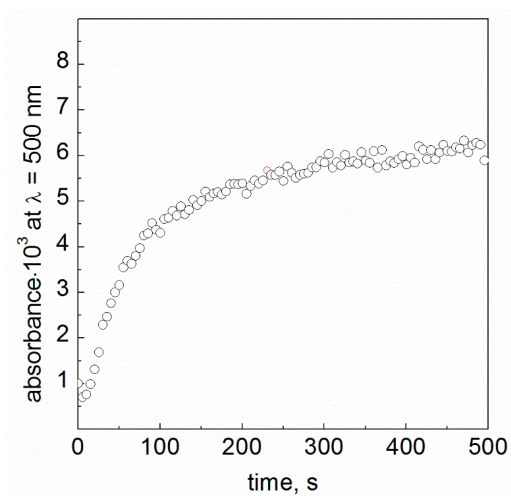

**Figure S8.** The change of absorbance value with time registered at 500 nm. Conditions:  $C_{0,Pt(IV)} = 0.05$  mM,  $C_{0,NaBH_4} = 3.0$  mM,  $I = 0.05$  M,  $T = 25.0 \pm 0.1$  °C.

## F. The Stoichiometry of Reduction Reaction of Pt(IV) Using Sodium Borohydride

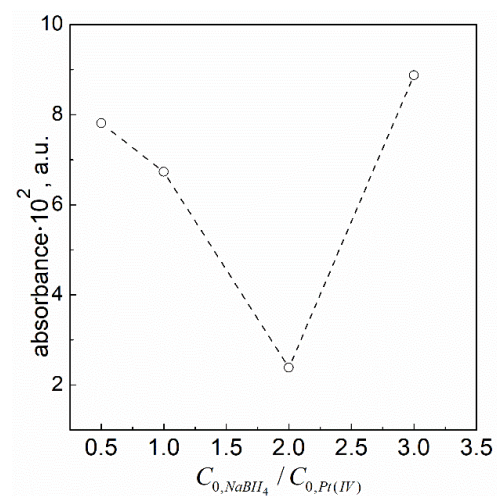

**Figure S9.** Graph of the dependence of absorbance as the function  $C_{0,NaBH_4}:C_{0,Pt(IV)}$ . Conditions: different initial concentrations of reagents,  $pH = 12.9 \pm 0.2$ ,  $T = 298 \pm 0.1$  K,  $I = 0.05$  M.

**Table S1.** The experimental condition for determination of reduction reaction stoichiometry.

| The Stoichiometry | Initial Concentration of Pt(IV), mM | Initial Concentration of NaBH <sub>4</sub> , mM |
|-------------------|-------------------------------------|-------------------------------------------------|
| 1:2               | 0.05                                | 0.10                                            |
| 1:1               | 0.05                                | 0.05                                            |
| 2:1               | 0.10                                | 0.05                                            |
| 3:1               | 0.15                                | 0.05                                            |
